# Supplementary material
Source: PubMed Central journal article supplement (PMC5838422)
Supplement: IMM-153-466-s001.pdf [file IMM-153-466-s001.pdf]

**A study of CDR3 loop dynamics reveals distinct mechanisms  
of peptide recognition by T-cell receptors exhibiting  
different levels of cross-reactivity**

**Yuko Tsuchiya, Yoshiki Namiuchi, Hiroshi Wako, and Hiromichi Tsurui**

**Supplementary materials**

**Figure S1**

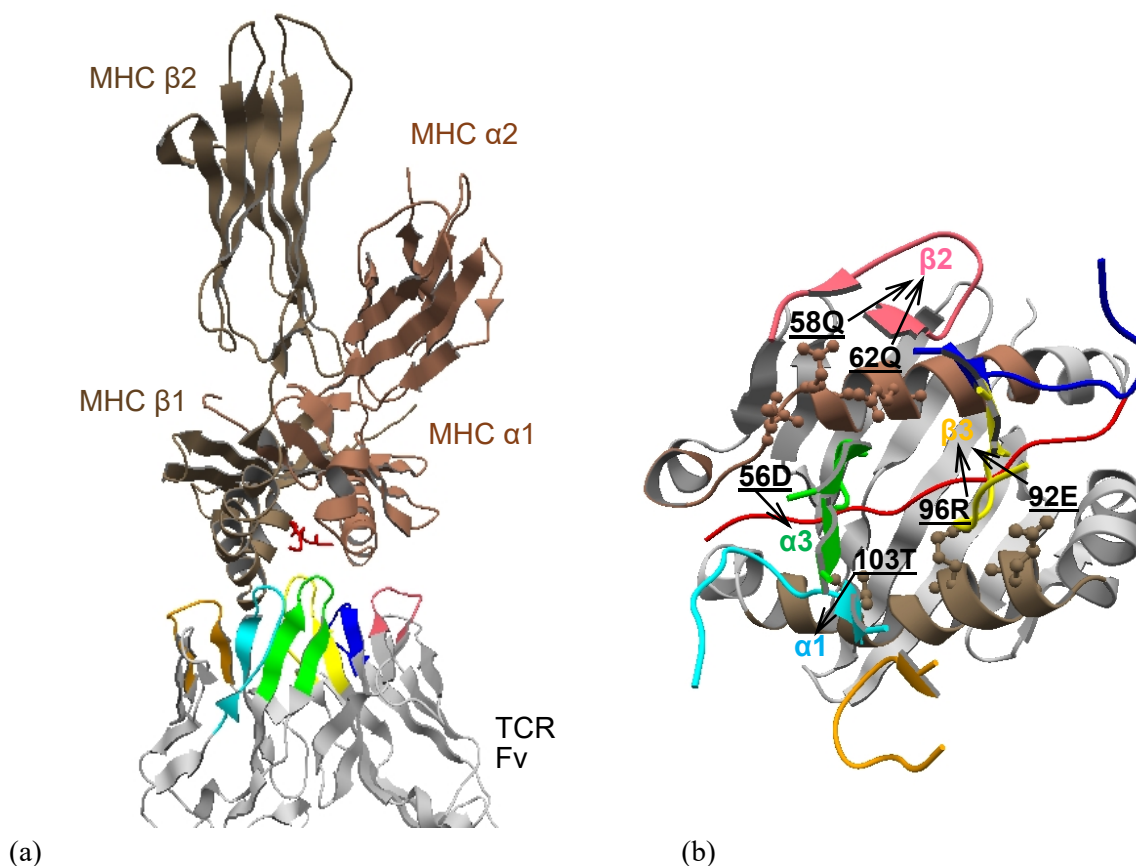

Fig. S1. Structural features of a TCR-pMHC complex and the positions of conserved TCR-MHC interactions on MHC.

(a) Structure of the B3K506-1A<sup>b</sup>-3K complex (PDB ID: 3c5z). MHC  $\alpha$  and  $\beta$  molecules are shown in light brown and dark brown, respectively. The peptide is shown in red. CDR1 $\alpha$ -3 $\alpha$  and CDR1 $\beta$ -3 $\beta$  are shown in cyan, orange, green, blue, pink, and yellow, respectively.

(b) The positions of MHC residues involved in conserved TCR-MHC interactions, all of which are located on the recognition helices except for Asp56 in MHC $\alpha$ , in the B3K506-1A<sup>b</sup>-3K complex. The relevant residues are shown using a ball-and-stick model with residue numbers. The arrows indicate the CDR loops in which the counterpart residues exist and which are observed in most of the complexes.

**Figure S2**

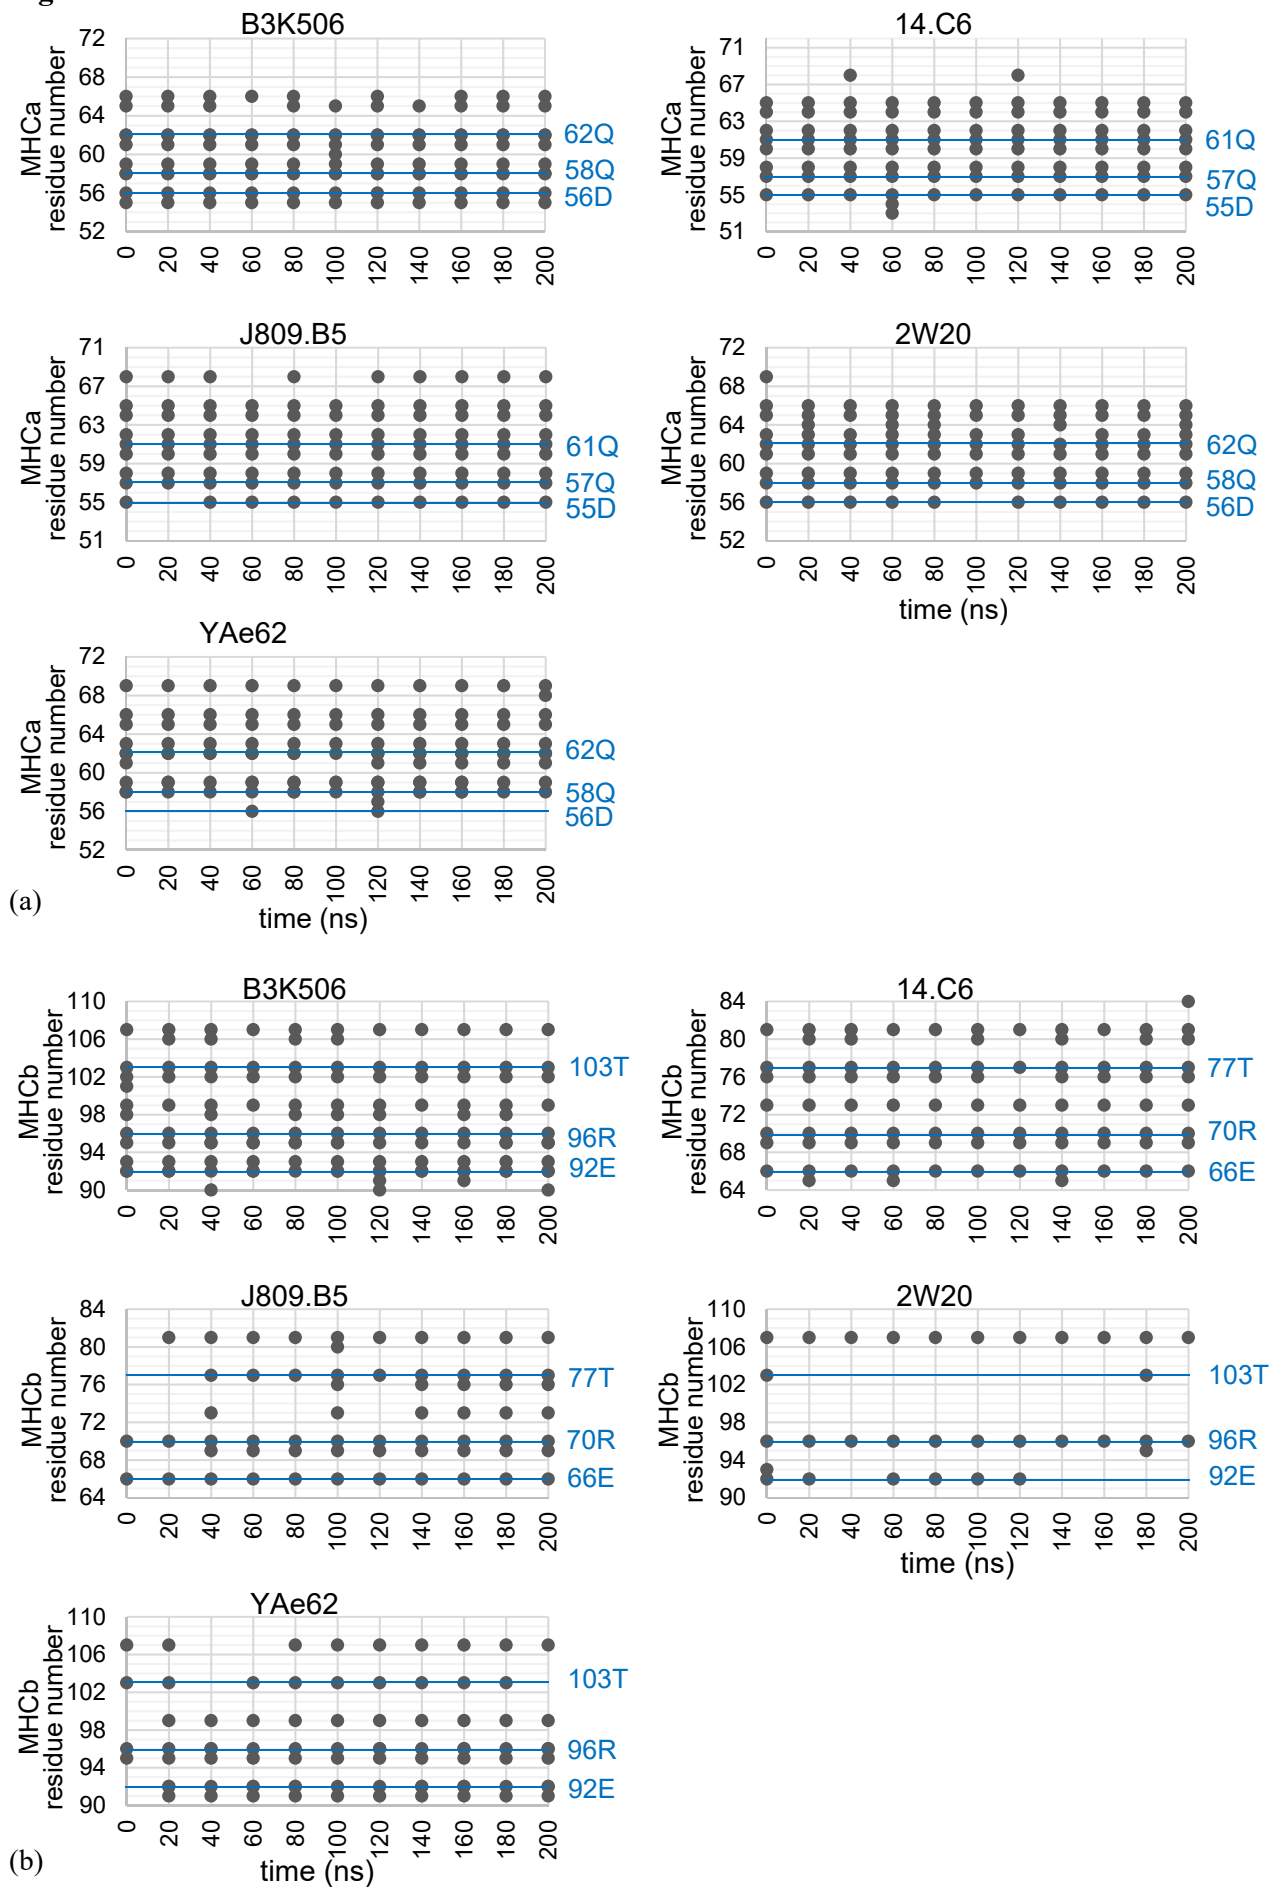

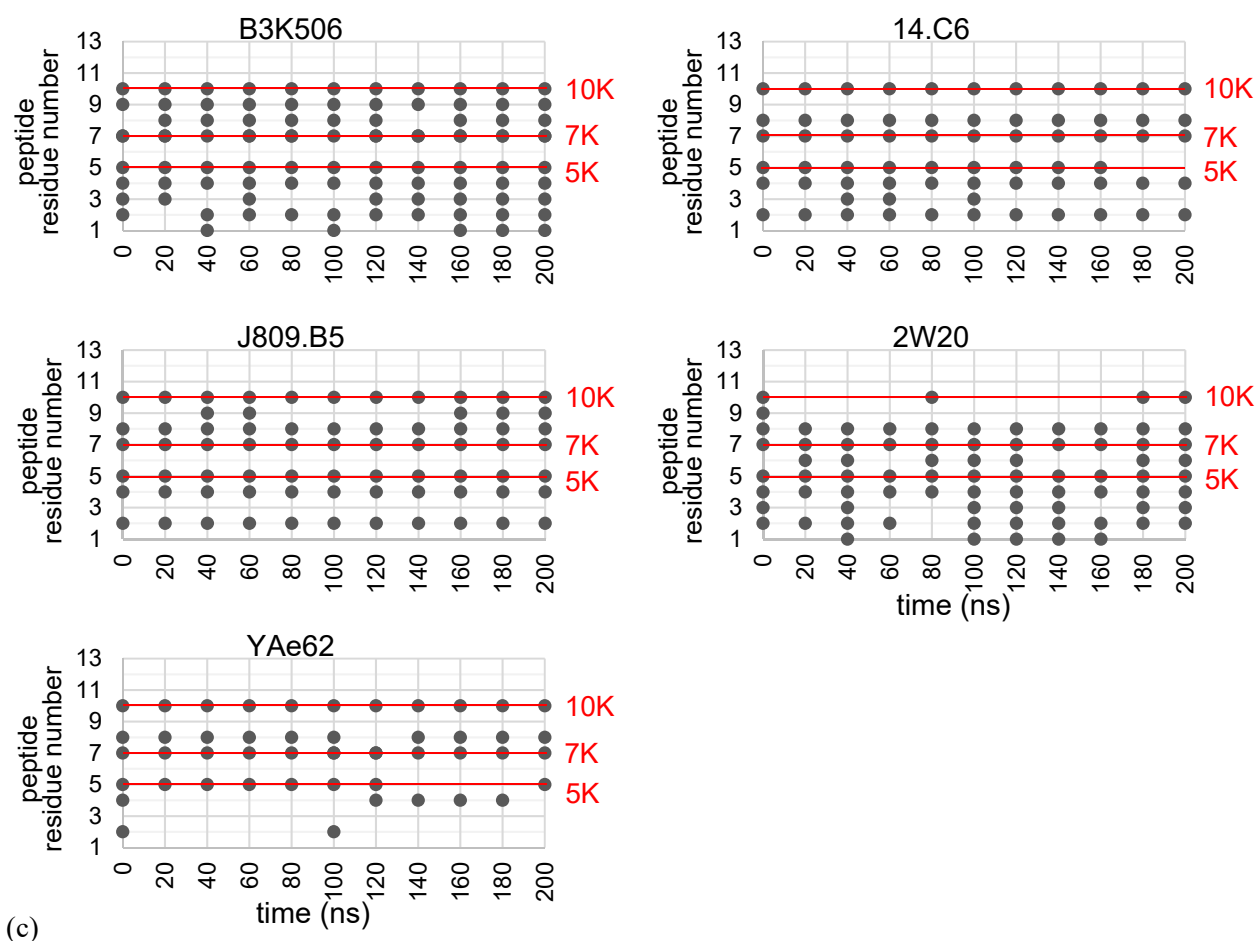

Fig. S2. Interactions between TCR and pMHC in crystal structures and MD snapshots. Interactions of any TCR residues with the MHC $\alpha$  residues 51–71 (or 52–72), MHC $\beta$  residues 64–84 (or 90–110), and peptide residues 1–13 are shown in (a), (b), and (c), respectively, each of which contains the figures for B3K506, 14.C6, J809.B5, 2W20, and YAc62. The black dots indicate that at least one atom in the MHC or peptide residues specified is located within a distance of 4.5 Å from any of the atoms in the TCR, in the crystal structure (represented at time step 0) and the MD snapshots (at every 20 ns from 20 to 200 ns). The residues with blue lines in (a) and (b) are involved in the conserved TCR-MHC interactions, and those with red lines in (c) are the three important Lys residues in the peptide. Note that in the peptide in the 14.C6 and J809.B5 complexes, the residue numbers of the three Lys residues in the PDB data are –21, –19 and –16, instead of 5, 7, and 10, respectively.

Figure S3

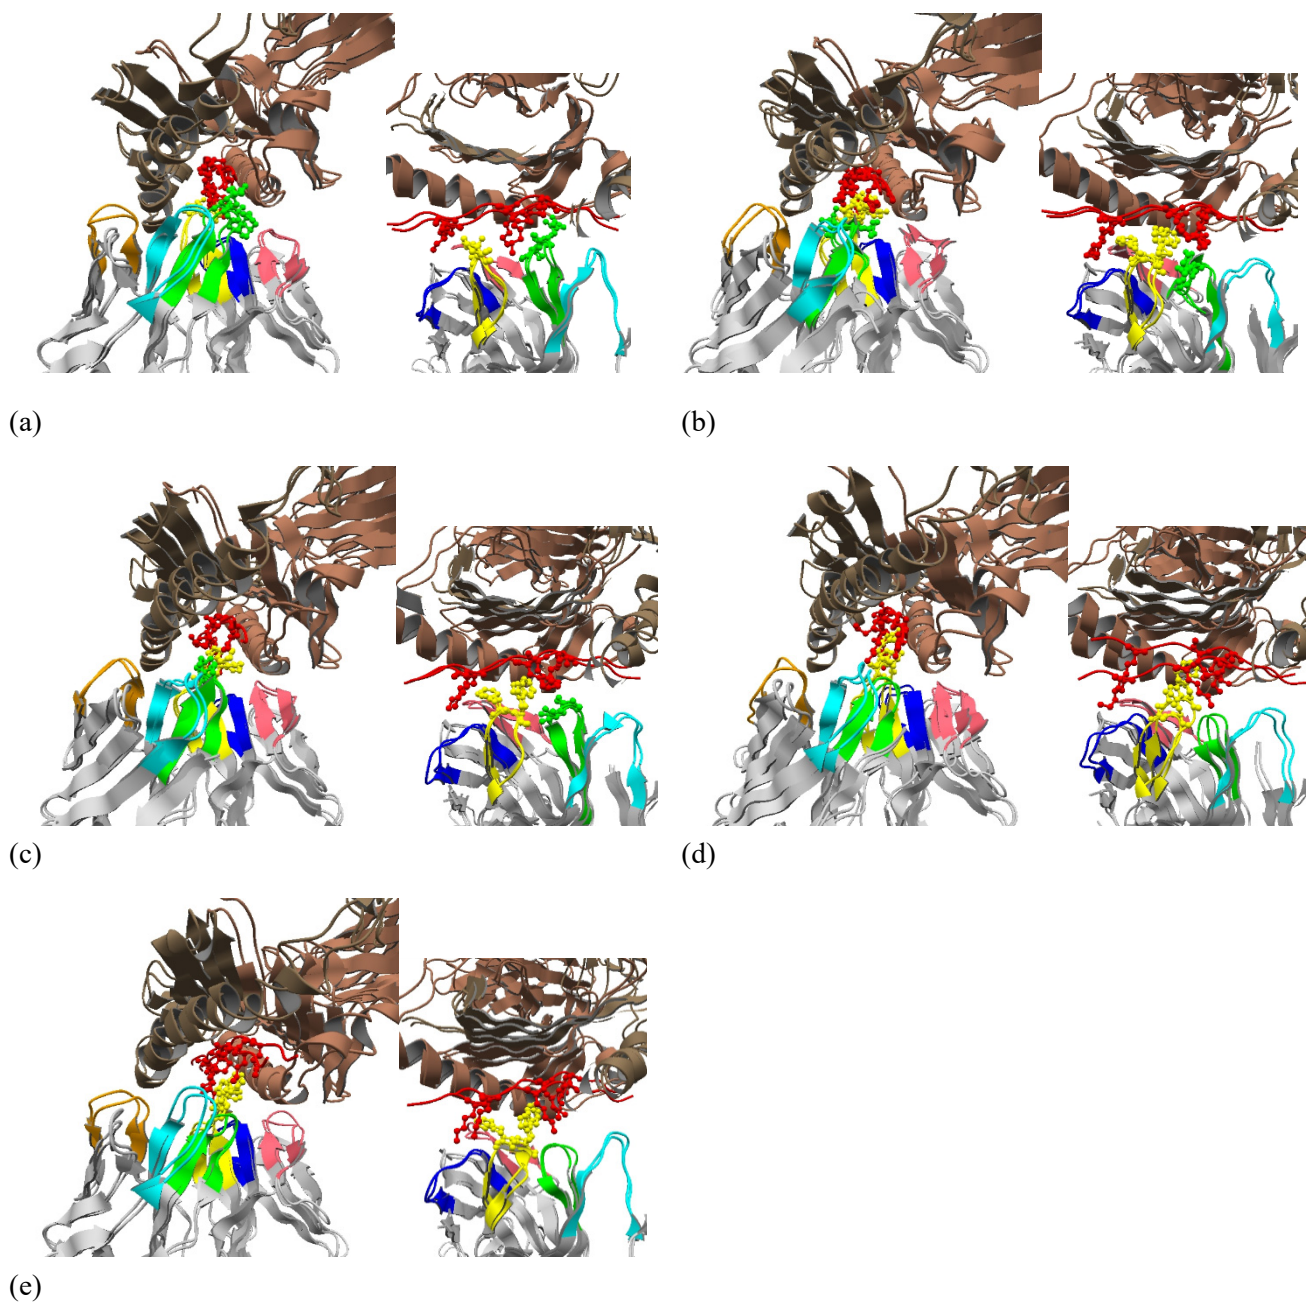

Fig. S3. Structural features of crystal structures and MD snapshot structures at 200 ns.

(a–e) Crystal structures and snapshots at 200 ns superimposed onto the crystal structure of B3K506 with respect to the TCR Fv regions except for CDR loops. (a), (b), (c), (d), and (e) show the figures from two angles of B3K506, 14.C6, J809.B5, 2W20, and YAc62, respectively, in complex with 1A<sup>b</sup>-3K. See caption of Fig. S1 for the interpretation of molecular colors. The 95<sup>th</sup> and 96<sup>th</sup> residues in CDR3 $\alpha$ , the 94<sup>th</sup> and 95<sup>th</sup> residues in CDR3 $\beta$ , and the three Lys residues in the peptide are shown using a ball-and-stick model.

Figure S4

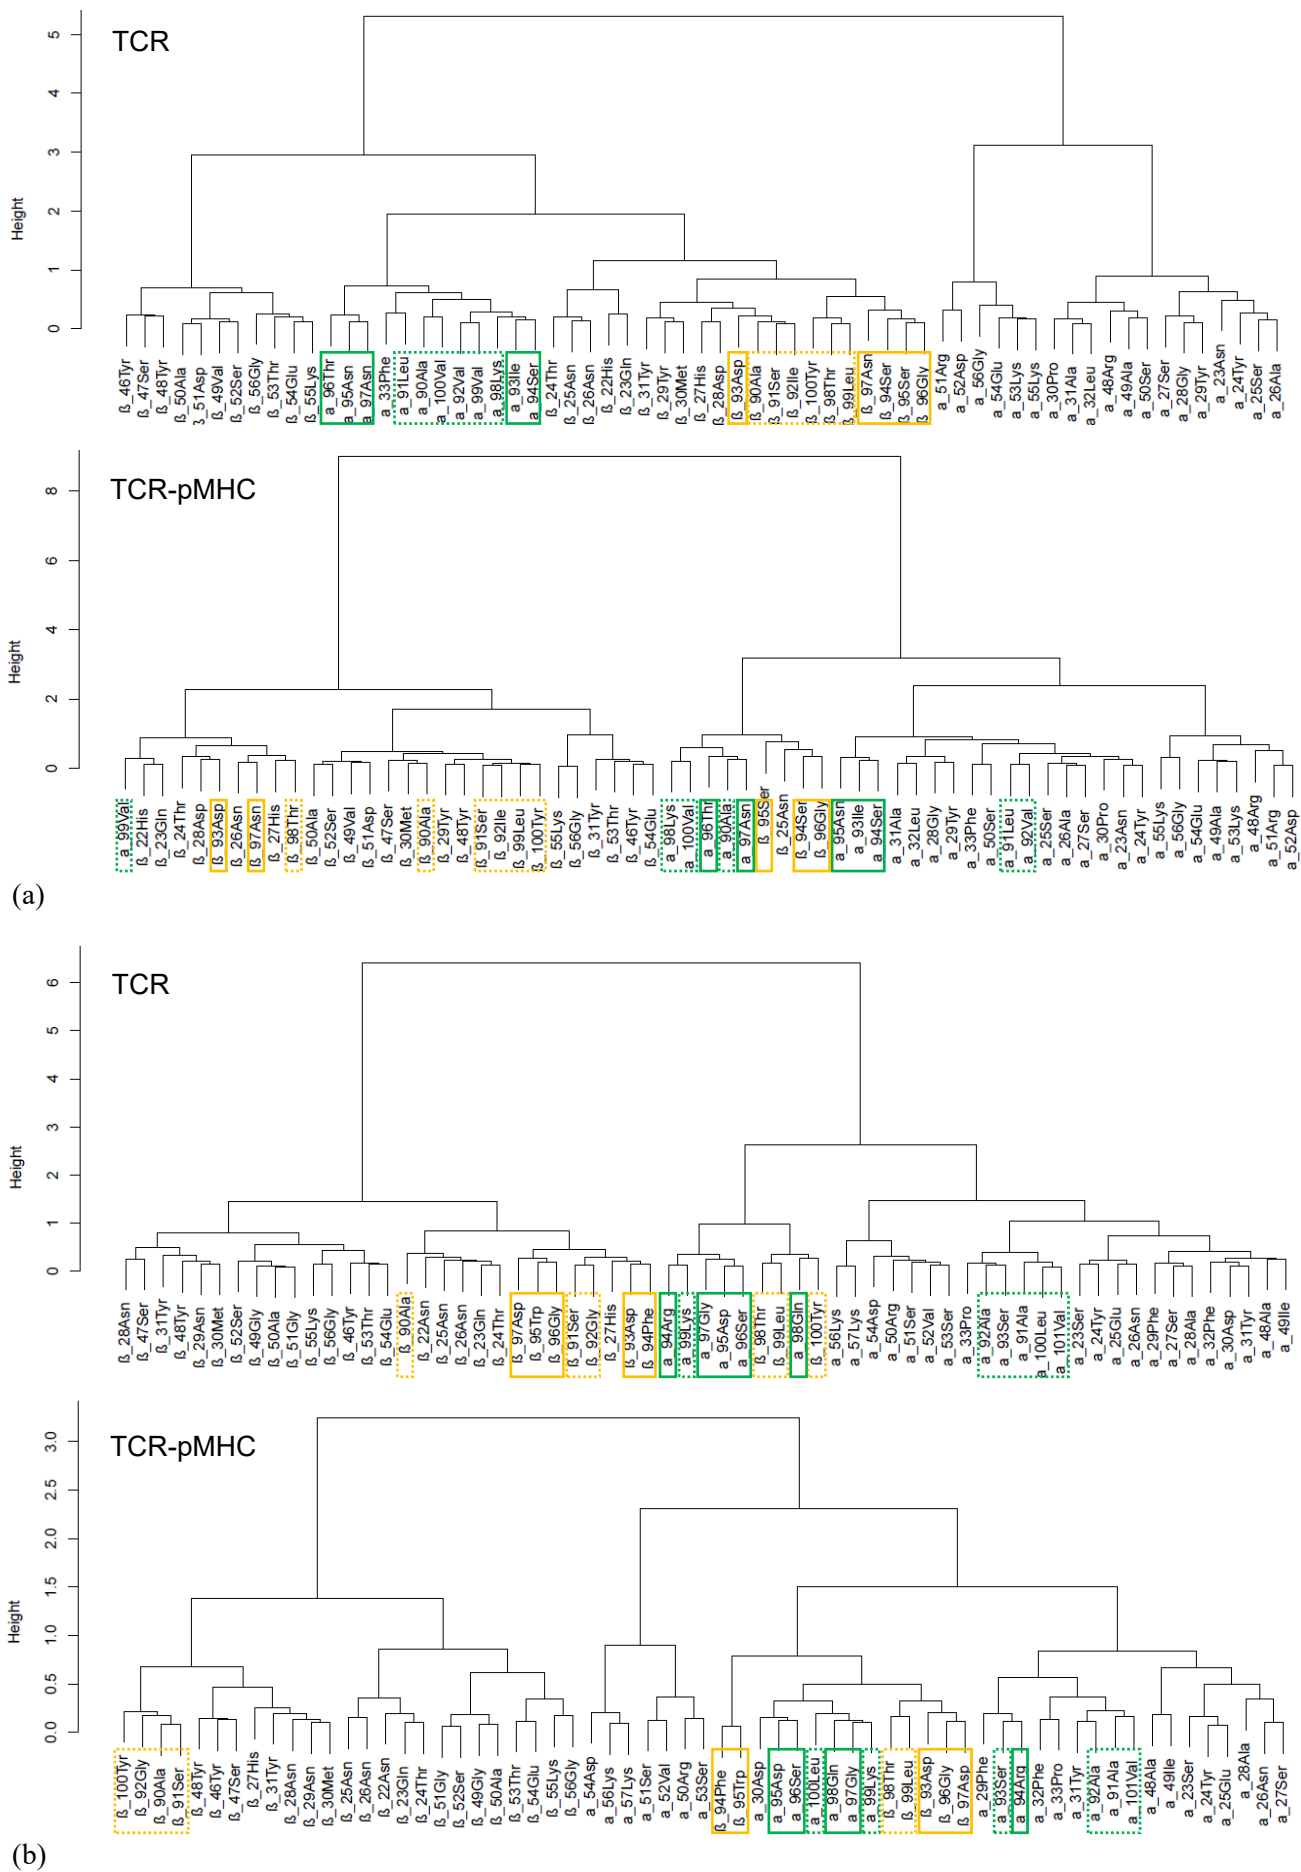

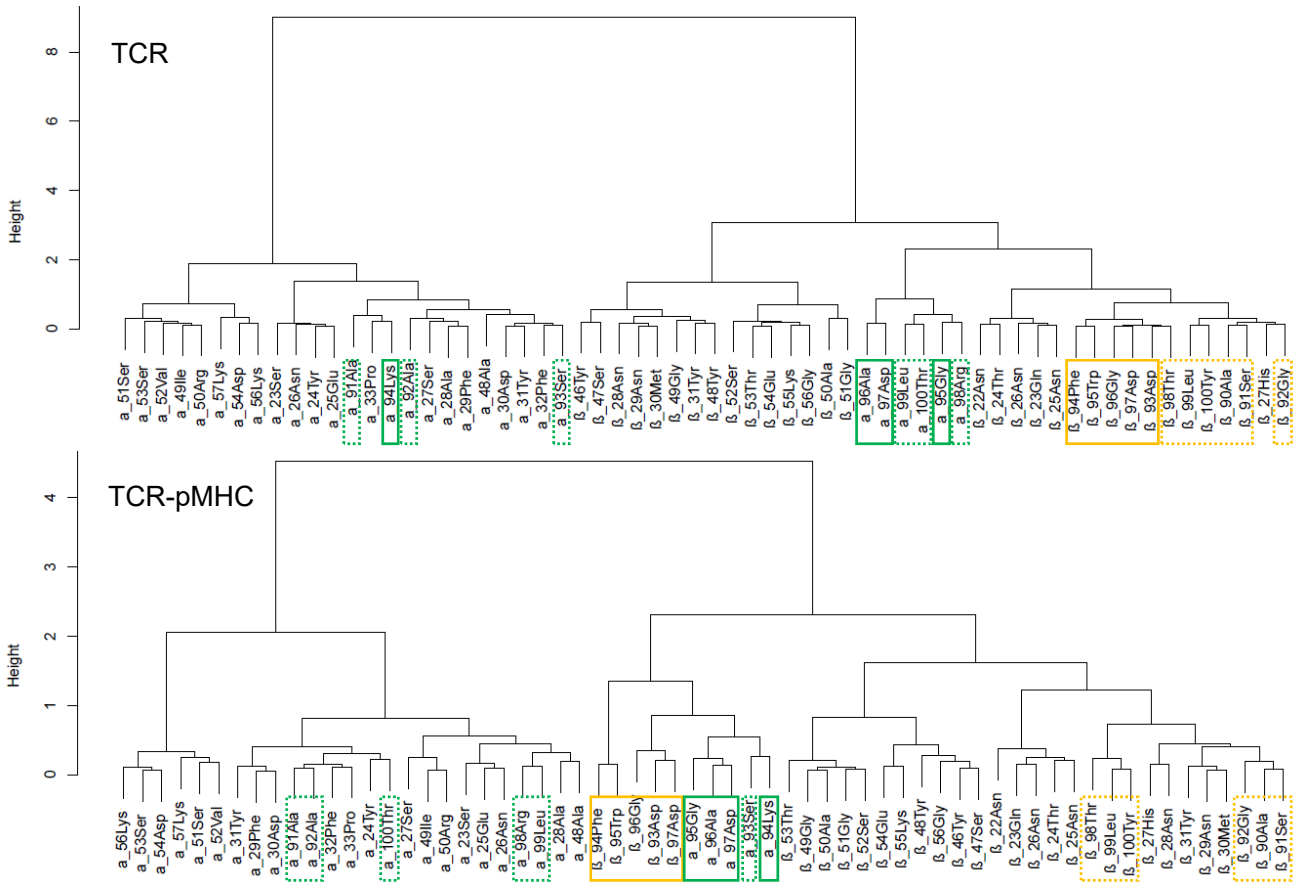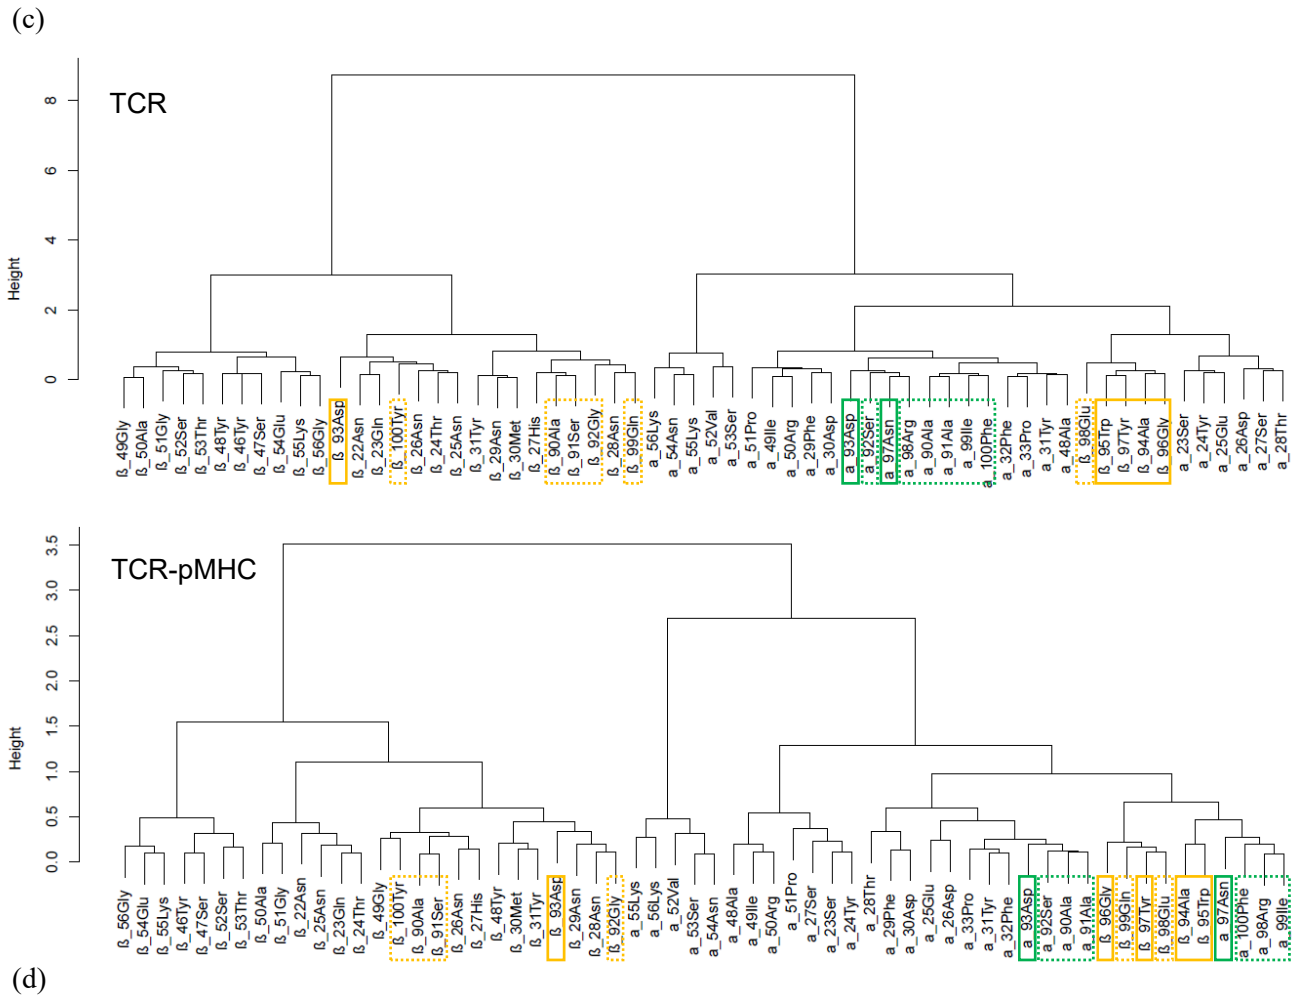

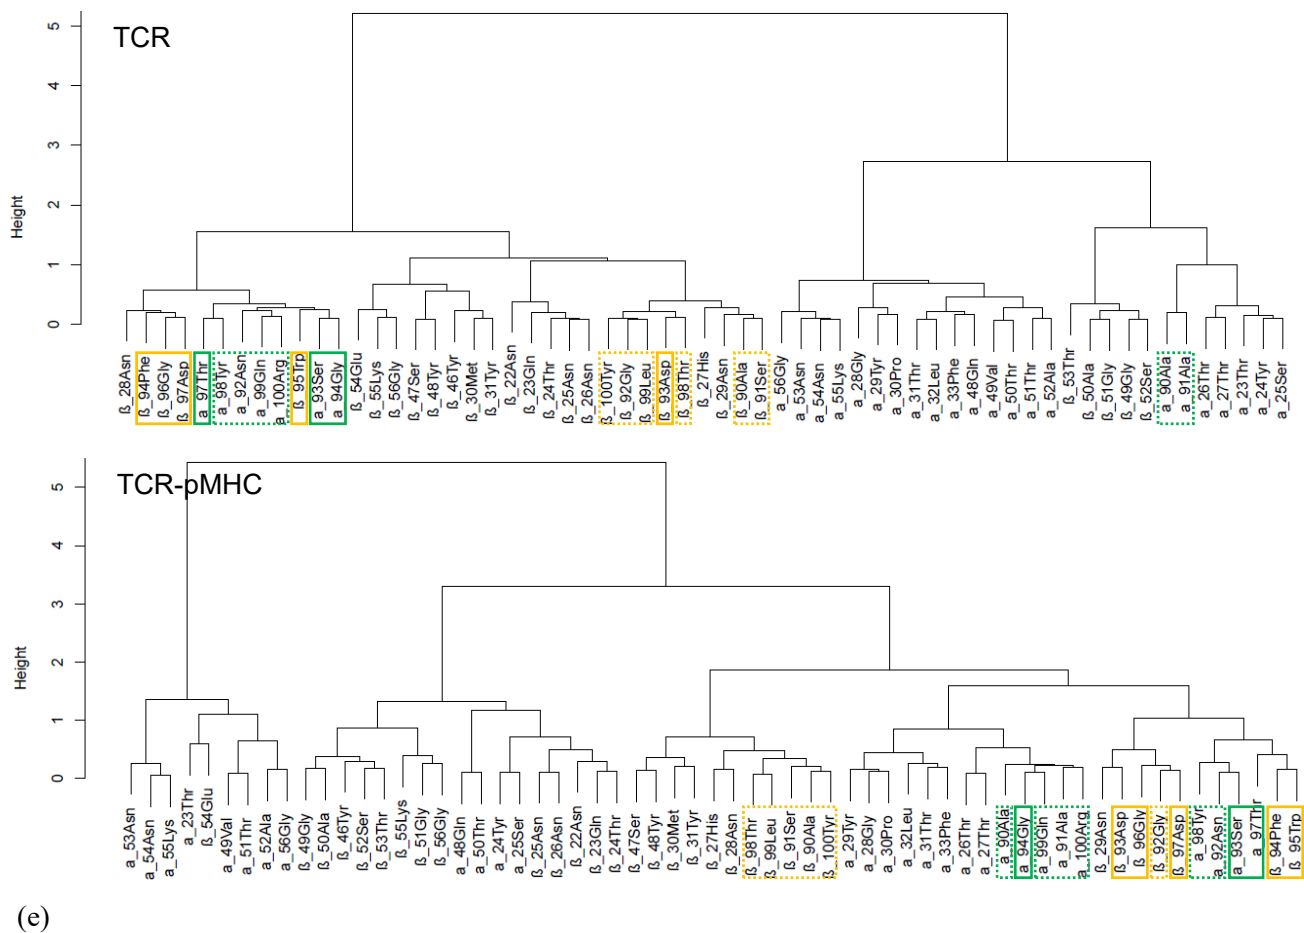

Fig. S4. Hierarchical clustering dendrograms of CDR residues of TCRs in the free and complex states. The clustering of CDR residues based on the correlation of fluctuations during MD simulations from 20 to 200 ns of TCRs in the free (labeled as TCR) and complex (as TCR-pMHC) states are shown. The clustering dendrograms in the free and complex states for B3K506, 14.C6, J809.B5, 2W20, and YAc62 are shown in (a), (b), (c), (d), and (e), respectively. The residues surrounded by green and yellow lines belong to CDR3 $\alpha$  and CDR3 $\beta$ , respectively. The solid and dotted lines indicate the turn and  $\beta$ -sheet regions of the CDR loops, respectively.



**Figure S5**

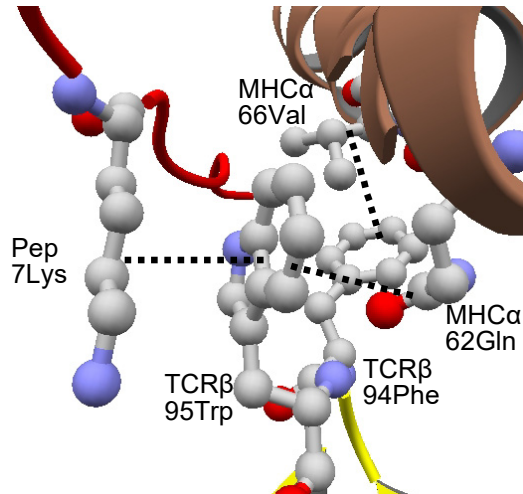

Fig. S5. CH- $\pi$  interactions of 94Phe and 95Trp in CDR3 $\beta$  of YAe62.

CH- $\pi$  interactions exist between 94Phe in CDR3 $\beta$  and 66Val in MHC $\alpha$ , 95Trp in CDR3 $\beta$  and 7Lys in the peptide, and 95Trp in CDR3 $\beta$  and 62Gln in MHC $\alpha$ , in the crystal structure and MD snapshot structures. The CH- $\pi$  interactions are indicated by dotted lines.

Figure S6

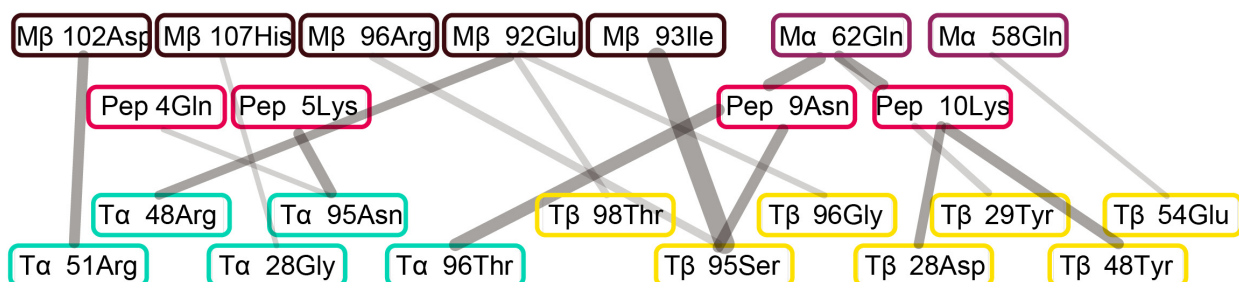

(a)

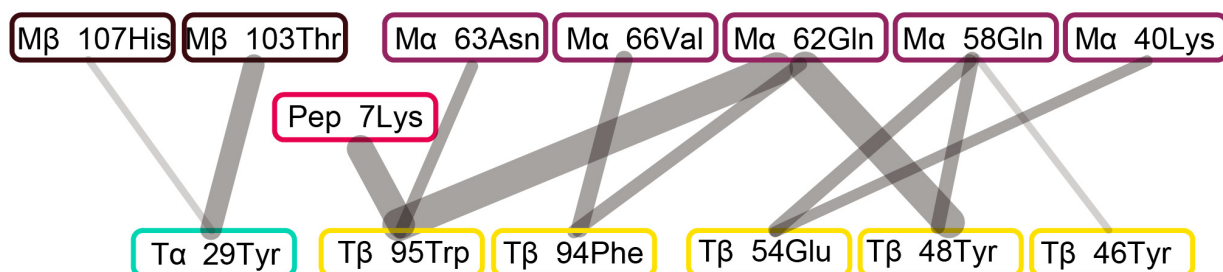

(b)

Fig. S6. Scattered (B3k506 in a) and concentrated (YAe62 in b) interaction networks, both in complex with 1A<sup>b</sup>-3K. The residue-residue interactions formed by more than five atomic contacts are connected by the grey lines. The width of the line is proportional to the number of atomic contacts. The MHC  $\alpha$  and  $\beta$  molecules (M $\alpha$  and M $\beta$ , respectively), peptide (Pep), and TCR  $\alpha$  and  $\beta$  molecules (T $\alpha$  and T $\beta$ , respectively) are shown in light brown, dark brown, red, green, and yellow, respectively.

**Table S1.** Conserved TCR-MHC interactions

|              | Residue in MHC <sup>a</sup> | # complex (%) <sup>b</sup> | TCR <sup>c</sup>   |                    |                    |
|--------------|-----------------------------|----------------------------|--------------------|--------------------|--------------------|
| MHC $\alpha$ | 55 E, D                     | 29 (94)                    | CDR3 $\alpha$ (27) |                    |                    |
|              | 57 Q                        | 30 (97)                    | CDR2 $\beta$ (28)  | CDR3 $\alpha$ (19) |                    |
|              | 61 A, Q, R                  | 30 (97)                    | CDR2 $\beta$ (27)  | CDR3 $\beta$ (19)  | CDR3 $\alpha$ (18) |
| MHC $\beta$  | 66 E, D                     | 27 (96 <sup>d</sup> )      | CDR3 $\beta$ (26)  |                    |                    |
|              | 70 Q, R                     | 28 (90)                    | CDR3 $\beta$ (24)  |                    |                    |
|              | 77 T, R, N                  | 27 (87)                    | CDR1 $\alpha$ (25) |                    |                    |

a) The most common residue numbers and amino acids in single letter code in the 31 complexes are shown. The corresponding residue numbers and amino acids in the MHCs in complex with B3K506, 2W20, and YAe62 are 56D, 58Q and 62Q in MHC $\alpha$  and 92E, 96R, and 103T in MHC $\beta$ , respectively.

b) The number of complexes, in which at least one atom in the TCR CDR is located within 4.5 Å from any atoms in the MHC residue is shown. The percentage of the 31 complexes represented by such complexes is given in parentheses.

c) The CDR loop that interacts with the MHC residue is specified. The number of complexes that contain such interactions is stated in parentheses.

d) Of the 31 complexes, only 28 complexes have this specified residue in the MHC. Therefore, the denominator of the percentage is 28 rather than 31.

**Table S2.** The number of TCR atoms in contact with the peptide and classification of the TCR atoms based on the CDRs they belong to for 31 complexes <sup>a</sup>

| <b>Complex</b> | <b># atom</b> | <b>CDR1<math>\alpha</math></b> | <b>CDR2<math>\alpha</math></b> | <b>CDR3<math>\alpha</math></b> | <b>CDR1<math>\beta</math></b> | <b>CDR2<math>\beta</math></b> | <b>CDR3<math>\beta</math></b> | <b>nonCDR</b> | <b>CDR3<math>\alpha</math>+3<math>\beta</math></b> |
|----------------|---------------|--------------------------------|--------------------------------|--------------------------------|-------------------------------|-------------------------------|-------------------------------|---------------|----------------------------------------------------|
| <b>1d9k</b>    | 91            | 0.38                           | 0.00                           | 0.42                           | 0.00                          | 0.00                          | 0.20                          | 0.00          | 0.62                                               |
| <b>1fyt</b>    | 72            | 0.10                           | 0.00                           | 0.28                           | 0.19                          | 0.00                          | 0.43                          | 0.00          | 0.71                                               |
| <b>1j8h</b>    | 72            | 0.13                           | 0.00                           | 0.25                           | 0.18                          | 0.00                          | 0.43                          | 0.01          | 0.68                                               |
| <b>1u3h</b>    | 66            | 0.12                           | 0.00                           | 0.71                           | 0.00                          | 0.00                          | 0.17                          | 0.00          | 0.88                                               |
| <b>1zgl</b>    | 90            | 0.16                           | 0.00                           | 0.40                           | 0.14                          | 0.11                          | 0.19                          | 0.00          | 0.59                                               |
| <b>2iam</b>    | 132           | 0.23                           | 0.00                           | 0.21                           | 0.17                          | 0.00                          | 0.38                          | 0.01          | 0.59                                               |
| <b>2ian</b>    | 139           | 0.22                           | 0.00                           | 0.22                           | 0.17                          | 0.00                          | 0.38                          | 0.01          | 0.60                                               |
| <b>2wbj</b>    | 126           | 0.00                           | 0.00                           | 0.41                           | 0.00                          | 0.02                          | 0.46                          | 0.10          | 0.87                                               |
| <b>3c5z</b>    | 88            | 0.13                           | 0.00                           | 0.44                           | 0.15                          | 0.00                          | 0.28                          | 0.00          | 0.73                                               |
| <b>3c60</b>    | 47            | 0.17                           | 0.00                           | 0.00                           | 0.06                          | 0.00                          | 0.77                          | 0.00          | 0.77                                               |
| <b>3c6l</b>    | 101           | 0.35                           | 0.00                           | 0.11                           | 0.07                          | 0.00                          | 0.48                          | 0.00          | 0.58                                               |
| <b>3mbe</b>    | 141           | 0.14                           | 0.00                           | 0.18                           | 0.20                          | 0.01                          | 0.46                          | 0.01          | 0.65                                               |
| <b>3o6f</b>    | 108           | 0.06                           | 0.00                           | 0.16                           | 0.15                          | 0.00                          | 0.61                          | 0.02          | 0.77                                               |
| <b>3pl6</b>    | 85            | 0.04                           | 0.00                           | 0.69                           | 0.09                          | 0.15                          | 0.02                          | 0.00          | 0.72                                               |
| <b>3qib</b>    | 173           | 0.14                           | 0.00                           | 0.38                           | 0.02                          | 0.03                          | 0.43                          | 0.00          | 0.80                                               |
| <b>3qiu</b>    | 156           | 0.12                           | 0.00                           | 0.33                           | 0.01                          | 0.06                          | 0.48                          | 0.00          | 0.81                                               |
| <b>3qiw</b>    | 146           | 0.14                           | 0.00                           | 0.42                           | 0.01                          | 0.04                          | 0.40                          | 0.00          | 0.82                                               |
| <b>3rdt</b>    | 77            | 0.01                           | 0.00                           | 0.32                           | 0.13                          | 0.00                          | 0.53                          | 0.00          | 0.86                                               |
| <b>3t0e</b>    | 94            | 0.09                           | 0.00                           | 0.19                           | 0.20                          | 0.00                          | 0.50                          | 0.02          | 0.69                                               |
| <b>4grl</b>    | 74            | 0.16                           | 0.00                           | 0.66                           | 0.07                          | 0.08                          | 0.01                          | 0.01          | 0.68                                               |
| <b>4h1l</b>    | 120           | 0.11                           | 0.00                           | 0.20                           | 0.04                          | 0.00                          | 0.64                          | 0.01          | 0.84                                               |
| <b>4may</b>    | 88            | 0.02                           | 0.00                           | 0.82                           | 0.07                          | 0.06                          | 0.03                          | 0.00          | 0.85                                               |
| <b>4p23</b>    | 89            | 0.01                           | 0.00                           | 0.34                           | 0.11                          | 0.00                          | 0.54                          | 0.00          | 0.88                                               |
| <b>4p2o</b>    | 99            | 0.20                           | 0.00                           | 0.42                           | 0.01                          | 0.06                          | 0.30                          | 0.00          | 0.73                                               |
| <b>4p2q</b>    | 160           | 0.08                           | 0.00                           | 0.41                           | 0.00                          | 0.16                          | 0.36                          | 0.00          | 0.77                                               |
| <b>4p2r</b>    | 131           | 0.12                           | 0.00                           | 0.37                           | 0.00                          | 0.16                          | 0.34                          | 0.00          | 0.72                                               |
| <b>4p46</b>    | 87            | 0.01                           | 0.00                           | 0.39                           | 0.09                          | 0.00                          | 0.51                          | 0.00          | 0.90                                               |
| <b>4p4k</b>    | 127           | 0.05                           | 0.00                           | 0.66                           | 0.08                          | 0.03                          | 0.18                          | 0.00          | 0.84                                               |
| <b>4p5t</b>    | 96            | 0.24                           | 0.00                           | 0.29                           | 0.01                          | 0.00                          | 0.49                          | 0.00          | 0.78                                               |
| <b>4y19</b>    | 21            | 0.00                           | 0.00                           | 0.00                           | 0.00                          | 0.86                          | 0.00                          | 0.14          | 0.00                                               |
| <b>4y1a</b>    | 27            | 0.00                           | 0.00                           | 0.00                           | 0.00                          | 1.00                          | 0.00                          | 0.00          | 0.00                                               |

a) In the first column, the 31 complexes are represented by their PDB IDs. In the second column, the number of TCR atoms that are in contact with the peptide are shown. Atomic contact is defined as at least one atom in the TCR being located within a distance of 4.5 Å from any of the atoms in the peptide. In the third to last columns, these TCR atoms are classified according to the CDRs to which they belong (the ratios to the number given in the second column are shown). NonCDR indicates the atoms that are not involved in the CDRs. CDR3 $\alpha$ +3 $\beta$  is the sum of the ratios of CDR3 $\alpha$  and CDR3 $\beta$ . The CDR regions are defined based on the IMGT 3D structure-DB <sup>1</sup> and Dunbrack definition <sup>2</sup>.

**Table S3.** Interface areas in crystal structures and MD snapshots <sup>a</sup>

| <b>B3K506</b>               | <b>T-pM</b> | <b>T-M</b> | <b>T-p</b> | <b>14.C6</b>                | <b>T-pM</b> | <b>T-M</b> | <b>T-p</b> |
|-----------------------------|-------------|------------|------------|-----------------------------|-------------|------------|------------|
| <b>Crystal</b>              | 1,163       | 932        | 455        | <b>Crystal</b>              | 1,033       | 822        | 382        |
| <b>20 ns</b>                | 1,191       | 963        | 434        | <b>20 ns</b>                | 1,093       | 853        | 379        |
| <b>40 ns</b>                | 1,202       | 993        | 439        | <b>40 ns</b>                | 1,175       | 938        | 421        |
| <b>60 ns</b>                | 1,229       | 971        | 462        | <b>60 ns</b>                | 1,110       | 918        | 383        |
| <b>80 ns</b>                | 1,219       | 997        | 423        | <b>80 ns</b>                | 1,140       | 931        | 383        |
| <b>100 ns</b>               | 1,291       | 1,039      | 476        | <b>100 ns</b>               | 1,117       | 887        | 403        |
| <b>120 ns</b>               | 1,231       | 1,030      | 435        | <b>120 ns</b>               | 1,143       | 910        | 373        |
| <b>140 ns</b>               | 1,243       | 986        | 475        | <b>140 ns</b>               | 1,094       | 878        | 367        |
| <b>160 ns</b>               | 1,171       | 940        | 468        | <b>160 ns</b>               | 1,109       | 897        | 372        |
| <b>180 ns</b>               | 1,275       | 1,055      | 478        | <b>180 ns</b>               | 1,148       | 927        | 383        |
| <b>200 ns</b>               | 1,245       | 1,005      | 470        | <b>200 ns</b>               | 1,128       | 886        | 389        |
| <b>Average <sup>b</sup></b> | 1,230       | 998        | 456        | <b>Average <sup>b</sup></b> | 1,126       | 903        | 385        |

| <b>J809.B5</b>              | <b>T-pM</b> | <b>T-M</b> | <b>T-p</b> | <b>2W20</b>                 | <b>T-pM</b> | <b>T-M</b> | <b>T-p</b> |
|-----------------------------|-------------|------------|------------|-----------------------------|-------------|------------|------------|
| <b>Crystal</b>              | 836         | 635        | 343        | <b>Crystal</b>              | 992         | 787        | 396        |
| <b>20 ns</b>                | 915         | 695        | 357        | <b>20 ns</b>                | 968         | 823        | 264        |
| <b>40 ns</b>                | 1,050       | 887        | 314        | <b>40 ns</b>                | 902         | 710        | 342        |
| <b>60 ns</b>                | 1,030       | 866        | 324        | <b>60 ns</b>                | 834         | 664        | 291        |
| <b>80 ns</b>                | 1,020       | 793        | 360        | <b>80 ns</b>                | 885         | 723        | 286        |
| <b>100 ns</b>               | 1,091       | 877        | 341        | <b>100 ns</b>               | 874         | 622        | 357        |
| <b>120 ns</b>               | 1,015       | 833        | 313        | <b>120 ns</b>               | 1010        | 750        | 383        |
| <b>140 ns</b>               | 1,136       | 901        | 381        | <b>140 ns</b>               | 938         | 691        | 356        |
| <b>160 ns</b>               | 1,057       | 866        | 343        | <b>160 ns</b>               | 899         | 677        | 328        |
| <b>180 ns</b>               | 1,098       | 911        | 320        | <b>180 ns</b>               | 999         | 796        | 326        |
| <b>200 ns</b>               | 1,055       | 965        | 337        | <b>200 ns</b>               | 919         | 699        | 352        |
| <b>Average <sup>b</sup></b> | 1,047       | 850        | 339        | <b>Average <sup>b</sup></b> | 923         | 716        | 329        |

| <b>YAc62</b>                | <b>T-pM</b> | <b>T-M</b> | <b>T-p</b> |
|-----------------------------|-------------|------------|------------|
| <b>Crystal</b>              | 760         | 596        | 304        |
| <b>20 ns</b>                | 789         | 691        | 185        |
| <b>40 ns</b>                | 767         | 645        | 198        |
| <b>60 ns</b>                | 834         | 714        | 215        |
| <b>80 ns</b>                | 810         | 700        | 198        |
| <b>100 ns</b>               | 811         | 687        | 227        |
| <b>120 ns</b>               | 945         | 809        | 253        |
| <b>140 ns</b>               | 955         | 816        | 255        |
| <b>160 ns</b>               | 941         | 799        | 265        |
| <b>180 ns</b>               | 874         | 769        | 221        |
| <b>200 ns</b>               | 850         | 760        | 167        |
| <b>Average <sup>b</sup></b> | 857         | 739        | 218        |

a) The interface areas ( $\text{\AA}^2$ ) between TCR and pMHC (T-pM), between TCR and MHC (T-M), and between TCR and peptide (T-p) in the crystal structure and the MD snapshot structures taken every 20 ns.

b) The average of the interface areas from the MD snapshots is shown.

**Table S4.** Number of atomic contacts in the crystal structure and MD snapshots <sup>a</sup>

(a) B3K506

|             | T-<br>pM | T-M | T $\alpha$ -<br>M $\alpha$ | T $\alpha$ -<br>M $\beta$ | T $\alpha$ -M | T $\beta$ -<br>M $\alpha$ | T $\beta$ -<br>M $\beta$ | T $\beta$ -M | T-p | T $\alpha$ -p | T $\beta$ -p | 94-pM | 94-p | 95-pM | 95-p |
|-------------|----------|-----|----------------------------|---------------------------|---------------|---------------------------|--------------------------|--------------|-----|---------------|--------------|-------|------|-------|------|
| <b>Crys</b> | 288      | 200 | 35                         | 57                        | 92            | 42                        | 66                       | 108          | 88  | 50            | 38           | 8     | 7    | 51    | 17   |
| <b>20</b>   | 370      | 299 | 56                         | 101                       | 157           | 79                        | 63                       | 142          | 71  | 39            | 32           | 9     | 7    | 28    | 13   |
| <b>40</b>   | 367      | 289 | 50                         | 92                        | 142           | 61                        | 86                       | 147          | 78  | 43            | 35           | 13    | 10   | 37    | 19   |
| <b>60</b>   | 313      | 237 | 43                         | 67                        | 110           | 43                        | 84                       | 127          | 76  | 42            | 34           | 10    | 8    | 32    | 15   |
| <b>80</b>   | 378      | 299 | 45                         | 89                        | 134           | 75                        | 90                       | 165          | 79  | 43            | 36           | 10    | 8    | 42    | 17   |
| <b>100</b>  | 408      | 314 | 63                         | 117                       | 180           | 61                        | 73                       | 134          | 94  | 62            | 32           | 9     | 9    | 28    | 15   |
| <b>120</b>  | 384      | 296 | 55                         | 126                       | 181           | 47                        | 68                       | 115          | 88  | 53            | 35           | 6     | 5    | 36    | 18   |
| <b>140</b>  | 350      | 247 | 61                         | 91                        | 152           | 44                        | 51                       | 95           | 103 | 66            | 37           | 9     | 9    | 28    | 11   |
| <b>160</b>  | 372      | 264 | 66                         | 79                        | 145           | 56                        | 63                       | 119          | 108 | 68            | 40           | 13    | 10   | 35    | 19   |
| <b>180</b>  | 425      | 320 | 56                         | 101                       | 157           | 66                        | 97                       | 163          | 105 | 73            | 32           | 11    | 9    | 32    | 8    |
| <b>200</b>  | 373      | 271 | 51                         | 83                        | 134           | 58                        | 79                       | 137          | 102 | 73            | 29           | 13    | 10   | 30    | 10   |
| <b>Ave</b>  | 374      | 284 | 55                         | 95                        | 149           | 59                        | 75                       | 134          | 90  | 56            | 34           | 10    | 9    | 33    | 15   |

(b) 14.C6

|             | T-<br>pM | T-M | T $\alpha$ -<br>M $\alpha$ | T $\alpha$ -<br>M $\beta$ | T $\alpha$ -M | T $\beta$ -<br>M $\alpha$ | T $\beta$ -<br>M $\beta$ | T $\beta$ -M | T-p | T $\alpha$ -p | T $\beta$ -p | 94-pM | 94-p | 95-pM | 95-p |
|-------------|----------|-----|----------------------------|---------------------------|---------------|---------------------------|--------------------------|--------------|-----|---------------|--------------|-------|------|-------|------|
| <b>Crys</b> | 328      | 232 | 16                         | 34                        | 50            | 135                       | 47                       | 182          | 96  | 49            | 47           | 28    | 5    | 98    | 38   |
| <b>20</b>   | 265      | 178 | 9                          | 29                        | 38            | 111                       | 29                       | 140          | 87  | 47            | 40           | 23    | 3    | 67    | 30   |
| <b>40</b>   | 275      | 169 | 31                         | 36                        | 67            | 80                        | 22                       | 102          | 106 | 61            | 45           | 20    | 1    | 70    | 36   |
| <b>60</b>   | 288      | 203 | 33                         | 62                        | 95            | 87                        | 21                       | 108          | 85  | 49            | 36           | 22    | 3    | 62    | 27   |
| <b>80</b>   | 277      | 197 | 12                         | 74                        | 86            | 88                        | 23                       | 111          | 80  | 42            | 38           | 33    | 1    | 60    | 27   |
| <b>100</b>  | 280      | 204 | 9                          | 57                        | 66            | 122                       | 16                       | 138          | 76  | 43            | 33           | 27    | 3    | 55    | 23   |
| <b>120</b>  | 284      | 211 | 16                         | 43                        | 59            | 128                       | 24                       | 152          | 73  | 45            | 28           | 39    | 0    | 59    | 20   |
| <b>140</b>  | 257      | 188 | 24                         | 43                        | 67            | 102                       | 19                       | 121          | 69  | 43            | 26           | 28    | 4    | 50    | 14   |
| <b>160</b>  | 265      | 185 | 13                         | 43                        | 56            | 113                       | 16                       | 129          | 80  | 45            | 35           | 35    | 2    | 49    | 26   |
| <b>180</b>  | 272      | 197 | 12                         | 58                        | 70            | 104                       | 23                       | 127          | 75  | 45            | 30           | 30    | 1    | 58    | 21   |
| <b>200</b>  | 280      | 203 | 13                         | 66                        | 79            | 95                        | 29                       | 124          | 77  | 41            | 36           | 17    | 0    | 58    | 26   |
| <b>Ave</b>  | 274      | 194 | 17                         | 51                        | 68            | 103                       | 22                       | 125          | 81  | 46            | 35           | 27    | 2    | 59    | 25   |

## (c) J809.B5

|             | T-pM | T-M | T $\alpha$ -M $\alpha$ | T $\alpha$ -M $\beta$ | T $\alpha$ -M | T $\beta$ -M $\alpha$ | T $\beta$ -M $\beta$ | T $\beta$ -M | T-p | T $\alpha$ -p | T $\beta$ -p | 94-pM | 94-p | 95-pM | 95-p |
|-------------|------|-----|------------------------|-----------------------|---------------|-----------------------|----------------------|--------------|-----|---------------|--------------|-------|------|-------|------|
| <b>Crys</b> | 279  | 202 | 11                     | 0                     | 11            | 156                   | 35                   | 191          | 77  | 26            | 51           | 34    | 5    | 90    | 36   |
| <b>20</b>   | 278  | 197 | 8                      | 4                     | 12            | 144                   | 41                   | 185          | 81  | 32            | 49           | 31    | 1    | 77    | 36   |
| <b>40</b>   | 282  | 237 | 15                     | 36                    | 51            | 137                   | 49                   | 186          | 45  | 24            | 21           | 35    | 5    | 71    | 16   |
| <b>60</b>   | 290  | 226 | 31                     | 30                    | 61            | 115                   | 50                   | 165          | 64  | 29            | 35           | 15    | 5    | 85    | 30   |
| <b>80</b>   | 318  | 236 | 30                     | 34                    | 64            | 124                   | 48                   | 172          | 82  | 41            | 41           | 39    | 5    | 58    | 28   |
| <b>100</b>  | 287  | 230 | 26                     | 48                    | 74            | 109                   | 47                   | 156          | 57  | 31            | 26           | 26    | 1    | 49    | 17   |
| <b>120</b>  | 302  | 221 | 21                     | 20                    | 41            | 125                   | 55                   | 180          | 81  | 31            | 50           | 33    | 2    | 76    | 37   |
| <b>140</b>  | 285  | 201 | 24                     | 32                    | 56            | 99                    | 46                   | 145          | 84  | 41            | 43           | 20    | 1    | 70    | 35   |
| <b>160</b>  | 300  | 227 | 36                     | 40                    | 76            | 106                   | 45                   | 151          | 73  | 36            | 37           | 38    | 2    | 59    | 26   |
| <b>180</b>  | 242  | 182 | 22                     | 37                    | 59            | 78                    | 45                   | 123          | 60  | 26            | 34           | 23    | 1    | 57    | 24   |
| <b>200</b>  | 273  | 213 | 32                     | 25                    | 57            | 107                   | 49                   | 156          | 60  | 20            | 40           | 28    | 2    | 68    | 30   |
| <b>Ave</b>  | 286  | 217 | 25                     | 31                    | 55            | 114                   | 48                   | 162          | 69  | 31            | 38           | 29    | 3    | 67    | 28   |

## (d) 2W20

|             | T-pM | T-M | T $\alpha$ -M $\alpha$ | T $\alpha$ -M $\beta$ | T $\alpha$ -M | T $\beta$ -M $\alpha$ | T $\beta$ -M $\beta$ | T $\beta$ -M | T-p | T $\alpha$ -p | T $\beta$ -p | 94-pM | 94-p | 95-pM | 95-p |
|-------------|------|-----|------------------------|-----------------------|---------------|-----------------------|----------------------|--------------|-----|---------------|--------------|-------|------|-------|------|
| <b>Crys</b> | 301  | 200 | 20                     | 19                    | 39            | 113                   | 48                   | 161          | 101 | 46            | 55           | 8     | 0    | 86    | 46   |
| <b>20</b>   | 245  | 197 | 48                     | 32                    | 80            | 110                   | 7                    | 117          | 48  | 19            | 29           | 5     | 0    | 79    | 29   |
| <b>40</b>   | 241  | 161 | 79                     | 12                    | 91            | 63                    | 7                    | 70           | 80  | 54            | 26           | 5     | 0    | 75    | 26   |
| <b>60</b>   | 213  | 161 | 39                     | 37                    | 76            | 81                    | 4                    | 85           | 52  | 20            | 32           | 8     | 0    | 68    | 32   |
| <b>80</b>   | 231  | 176 | 59                     | 36                    | 95            | 77                    | 4                    | 81           | 55  | 24            | 31           | 10    | 0    | 62    | 30   |
| <b>100</b>  | 244  | 156 | 35                     | 33                    | 68            | 88                    | 0                    | 88           | 88  | 61            | 27           | 5     | 0    | 73    | 27   |
| <b>120</b>  | 296  | 193 | 51                     | 48                    | 99            | 94                    | 0                    | 94           | 103 | 64            | 39           | 5     | 0    | 72    | 39   |
| <b>140</b>  | 281  | 183 | 47                     | 31                    | 78            | 105                   | 0                    | 105          | 98  | 69            | 29           | 9     | 0    | 59    | 29   |
| <b>160</b>  | 242  | 160 | 63                     | 25                    | 88            | 71                    | 1                    | 72           | 82  | 51            | 31           | 4     | 0    | 58    | 31   |
| <b>180</b>  | 246  | 161 | 46                     | 28                    | 74            | 83                    | 4                    | 87           | 85  | 47            | 38           | 6     | 0    | 78    | 37   |
| <b>200</b>  | 244  | 155 | 61                     | 22                    | 83            | 72                    | 0                    | 72           | 89  | 41            | 48           | 6     | 0    | 72    | 47   |
| <b>Ave</b>  | 248  | 170 | 53                     | 30                    | 83            | 84                    | 3                    | 87           | 78  | 45            | 33           | 6     | 0    | 70    | 33   |

(e) YAc62

|             | T-pM | T-M | T $\alpha$ -M $\alpha$ | T $\alpha$ -M $\beta$ | T $\alpha$ -M | T $\beta$ -M $\alpha$ | T $\beta$ -M $\beta$ | T $\beta$ -M | T-p | T $\alpha$ -p | T $\beta$ -p | 94-pM | 94-p | 95-pM | 95-p |
|-------------|------|-----|------------------------|-----------------------|---------------|-----------------------|----------------------|--------------|-----|---------------|--------------|-------|------|-------|------|
| <b>Crys</b> | 274  | 227 | 8                      | 33                    | 41            | 185                   | 1                    | 186          | 47  | 8             | 39           | 42    | 2    | 84    | 34   |
| <b>20</b>   | 203  | 174 | 3                      | 58                    | 61            | 112                   | 1                    | 113          | 29  | 0             | 29           | 36    | 6    | 49    | 17   |
| <b>40</b>   | 180  | 145 | 1                      | 46                    | 47            | 89                    | 9                    | 98           | 35  | 0             | 35           | 22    | 0    | 66    | 28   |
| <b>60</b>   | 221  | 188 | 3                      | 58                    | 61            | 126                   | 1                    | 127          | 33  | 0             | 33           | 48    | 5    | 53    | 19   |
| <b>80</b>   | 220  | 178 | 5                      | 62                    | 67            | 110                   | 1                    | 111          | 42  | 0             | 42           | 25    | 5    | 63    | 28   |
| <b>100</b>  | 250  | 193 | 2                      | 51                    | 53            | 140                   | 0                    | 140          | 57  | 8             | 49           | 44    | 5    | 77    | 35   |
| <b>120</b>  | 275  | 215 | 4                      | 36                    | 40            | 165                   | 10                   | 175          | 60  | 19            | 41           | 31    | 3    | 68    | 30   |
| <b>140</b>  | 306  | 260 | 7                      | 80                    | 87            | 172                   | 1                    | 173          | 46  | 9             | 37           | 39    | 5    | 65    | 23   |
| <b>160</b>  | 273  | 231 | 14                     | 69                    | 83            | 144                   | 4                    | 148          | 42  | 10            | 32           | 35    | 2    | 59    | 21   |
| <b>180</b>  | 254  | 211 | 2                      | 45                    | 47            | 164                   | 0                    | 164          | 43  | 7             | 36           | 44    | 6    | 62    | 23   |
| <b>200</b>  | 194  | 169 | 1                      | 33                    | 34            | 123                   | 12                   | 135          | 25  | 0             | 25           | 38    | 2    | 46    | 14   |
| <b>Ave</b>  | 238  | 196 | 4                      | 54                    | 58            | 135                   | 4                    | 138          | 41  | 5             | 36           | 36    | 4    | 61    | 24   |

a) The number of atomic contacts between components of TCR-pMHC are shown. The following abbreviations are used for the components: T: TCR, T $\alpha$ :  $\alpha$  subunit of TCR, T $\beta$ :  $\beta$  subunit of TCR, M: MHC, M $\alpha$ :  $\alpha$  subunit of MHC, M $\beta$ :  $\beta$  subunit of MHC, p: peptide, pM: peptide-MHC, 94: residue 94 of TCR  $\beta$ , and 95: residue 95 of TCR  $\beta$ . An atomic contact is defined as at least one atom in one component being located within a distance of 4.5 Å from any of the atoms in another component and vice versa. Data obtained from the crystal structure (Crys) and the MD snapshots taken every 20 ns from 20 ns to 200 ns are shown. The averages (Ave) of the data obtained from the 10 snapshots are also shown in the last row.



**Table S5.** The numbers of inter-CDR loop atomic contacts in the MD snapshots <sup>a</sup>

(a) B3K506

| TCR in free state |               |  | TCR-pMHC complex |               |            |
|-------------------|---------------|--|------------------|---------------|------------|
| CDR3 $\beta$      | CDR3 $\alpha$ |  | CDR3 $\beta$     | CDR3 $\alpha$ |            |
| 90Ala             | 0             |  | 90Ala            | 0             |            |
| 91Ser             | 0             |  | 91Ser            | 0             |            |
| 92Ile             | 8             |  | 92Ile            | 54            | 97Asn (50) |
| 93Asp             | 0             |  | 93Asp            | 0             |            |
| 94Ser             | 0             |  | 94Ser            | 0             |            |
| 95Ser             | 0             |  | 95Ser            | 0             |            |
| 96Gly             | 0             |  | 96Gly            | 10            |            |
| 97Asn             | 1             |  | 97Asn            | 96            | 97Asn (92) |
| 98Thr             | 0             |  | 98Thr            | 1             |            |
| 99Leu             | 20            |  | 99Leu            | 32            |            |
| 100Tyr            | 0             |  | 100Tyr           | 0             |            |
| total             | 29            |  | total            | 193           |            |

(b) 14.C6

| TCR in free state |               |                        | TCR-pMHC complex |               |                        |
|-------------------|---------------|------------------------|------------------|---------------|------------------------|
| CDR3 $\beta$      | CDR3 $\alpha$ |                        | CDR3 $\beta$     | CDR3 $\alpha$ |                        |
| 90Ala             | 0             |                        | 90Ala            | 0             |                        |
| 91Ser             | 3             |                        | 91Ser            | 0             |                        |
| 92Gly             | 97            | 98Gln (97)             | 92Gly            | 76            | 98Gln (76)             |
| 93Asp             | 76            | 98Gln (76)             | 93Asp            | 115           | 98Gln (115)            |
| 94Phe             | 0             |                        | 94Phe            | 4             |                        |
| 95Trp             | 215           | 96Ser (184) 97Gly (22) | 95Trp            | 194           | 95Asp (101) 96Ser (62) |
| 96Gly             | 92            | 98Gln (69)             | 96Gly            | 203           | 98Gln (121) 97Gly (53) |
| 97Asp             | 37            |                        | 97Asp            | 63            | 97Gly (38) 96Ser (23)  |
| 98Thr             | 30            |                        | 98Thr            | 39            |                        |
| 99Leu             | 88            | 98Gln (59)             | 99Leu            | 111           | 98Gln (44) 100Leu (46) |
| 100Tyr            | 0             |                        | 100Tyr           | 0             |                        |
| total             | 638           |                        | total            | 805           |                        |

## (c) J809.B5

| TCR in free state |               |                                    | TCR-pMHC complex |               |                                   |
|-------------------|---------------|------------------------------------|------------------|---------------|-----------------------------------|
| CDR3 $\beta$      | CDR3 $\alpha$ |                                    | CDR3 $\beta$     | CDR3 $\alpha$ |                                   |
| 90Ala             | 0             |                                    | 90Ala            | 0             |                                   |
| 91Ser             | 0             |                                    | 91Ser            | 0             |                                   |
| 92Gly             | 0             |                                    | 92Gly            | 0             |                                   |
| 93Asp             | 0             |                                    | 93Asp            | 0             |                                   |
| 94Phe             | 0             |                                    | 94Phe            | 0             |                                   |
| 95Trp             | 429           | 97Asp (196) 96Ala (139) 98Arg (84) | 95Trp            | 166           | 96Ala (120) 97Asp (28) 95Gly (18) |
| 96Gly             | 1             |                                    | 96Gly            | 1             |                                   |
| 97Asp             | 6             |                                    | 97Asp            | 1             |                                   |
| 98Thr             | 1             |                                    | 98Thr            | 0             |                                   |
| 99Leu             | 14            |                                    | 99Leu            | 20            |                                   |
| 100Tyr            | 0             |                                    | 100Tyr           | 0             |                                   |
| total             | 451           |                                    | total            | 188           |                                   |

## (d) 2W20

| TCR in free state |               |                                   | TCR-pMHC complex |               |                                  |
|-------------------|---------------|-----------------------------------|------------------|---------------|----------------------------------|
| CDR3 $\beta$      | CDR3 $\alpha$ |                                   | CDR3 $\beta$     | CDR3 $\alpha$ |                                  |
| 90Ala             | 0             |                                   | 90Ala            | 0             |                                  |
| 91Ser             | 0             |                                   | 91Ser            | 0             |                                  |
| 92Gly             | 0             |                                   | 92Gly            | 0             |                                  |
| 93Asp             | 0             |                                   | 93Asp            | 1             |                                  |
| 94Ala             | 1             |                                   | 94Ala            | 0             |                                  |
| 95Trp             | 250           | 97Asn (142) 93Asp (62) 92Ser (31) | 95Trp            | 37            | 93Asp (36)                       |
| 96Gly             | 128           | 92Ser (61) 99Ile (34) 97Asn (22)  | 96Gly            | 116           | 93Asp (58) 97Asn (28) 92Ser (30) |
| 97Tyr             | 44            |                                   | 97Tyr            | 3             |                                  |
| 98Glu             | 4             |                                   | 98Glu            | 0             |                                  |
| 99Gln             | 38            |                                   | 99Gln            | 65            | 99Ile (63)                       |
| 100Tyr            | 0             |                                   | 100Tyr           | 0             |                                  |
| total             | 465           |                                   | total            | 222           |                                  |

## (e) YAc62

| TCR in free state |               |                                  | TCR-pMHC complex |               |                                   |
|-------------------|---------------|----------------------------------|------------------|---------------|-----------------------------------|
| CDR3 $\beta$      | CDR3 $\alpha$ |                                  | CDR3 $\beta$     | CDR3 $\alpha$ |                                   |
| 90Ala             | 0             |                                  | 90Ala            | 0             |                                   |
| 91Ser             | 0             |                                  | 91Ser            | 0             |                                   |
| 92Gly             | 0             |                                  | 92Gly            | 0             |                                   |
| 93Asp             | 0             |                                  | 93Asp            | 0             |                                   |
| 94Phe             | 0             |                                  | 94Phe            | 0             |                                   |
| 95Trp             | 171           | 97Thr (77) 92Asn (40) 94Gly (46) | 95Trp            | 257           | 97Thr (110) 92Asn (42) 94Gly (83) |
| 96Gly             | 138           | 99Gln (55) 92Asn (50) 97Thr (25) | 96Gly            | 103           | 97Thr (37) 92Asn (30) 99Gln (33)  |
| 97Asp             | 20            |                                  | 97Asp            | 8             |                                   |
| 98Thr             | 17            |                                  | 98Thr            | 0             |                                   |
| 99Leu             | 58            |                                  | 99Leu            | 32            |                                   |
| 100Tyr            | 0             |                                  | 100Tyr           | 0             |                                   |
| total             | 404           |                                  | total            | 400           |                                   |

a) The sum of the atomic contacts observed in the 10 MD snapshots taken every 20 ns from 20 to 200 ns are shown for residues in CDR3 $\beta$  with CDR3 $\alpha$ . The total number of the atomic contacts in CDR3 $\beta$  is shown in the last row. The partner residues in CDR3 $\alpha$  are shown only if the number of the atomic contacts is larger than 50; the number of atomic contacts are shown in parenthesis

**Table S6.** Maintained, added, and lost hydrogen bonds between TCR and peptide/MHC during the MD simulations <sup>a</sup>

(a) B3K506

|            | TCR CDR             | peptide/MHC            |
|------------|---------------------|------------------------|
| Added      | $\alpha$ 27 Ser O   | Peptide 2Glu N         |
| Added      | $\alpha$ 48 Arg NE  | MHC $\beta$ 95Glu OE1  |
| Added      | $\alpha$ 48 Arg NH2 | MHC $\beta$ 95Glu OE2  |
| Lost       | $\alpha$ 95 Asn ND2 | Peptide 2Glu OE1       |
| Lost       | $\alpha$ 95 Asn ND2 | Peptide 3Ala O         |
| Added      | $\alpha$ 95 Asn O   | Peptide 5Lys NZ        |
| Lost       | $\alpha$ 95 Asn OD1 | Peptide 5Lys N         |
| Added      | $\alpha$ 95 Asn OD1 | Peptide 5Lys NZ        |
| Maintained | $\alpha$ 96 Thr O   | MHC $\alpha$ 62Gln NE2 |
| Lost       | $\alpha$ 97 Asn OD1 | Peptide 7Lys NZ        |
| Maintained | $\beta$ 28 Asp OD2  | Peptide 10Lys NZ       |
| Lost       | $\beta$ 29 Tyr OH   | MHC $\alpha$ 62Gln OE1 |
| Added      | $\beta$ 46 Tyr OH   | MHC $\alpha$ 58Gln OE1 |
| Maintained | $\beta$ 95 Ser O    | MHC $\beta$ 96Arg NH1  |
| Maintained | $\beta$ 95 Ser OG   | Peptide 10Lys N        |
| Added      | $\beta$ 97 Asn N    | MHC $\beta$ 92Glu OE2  |
| Added      | $\beta$ 97 Asn ND2  | MHC $\beta$ 95Glu OE1  |
| Added      | $\beta$ 98 Thr N    | MHC $\beta$ 92Glu OE2  |
| Added      | $\beta$ 100 Tyr OH  | MHC $\beta$ 92Glu OE1  |

The numbers of hydrogen bonds maintained, added, and lost are 4, 10, and 5, respectively.

(b) 14.C6

|            | TCR CDR                | peptide/MHC            |
|------------|------------------------|------------------------|
| Maintained | $\alpha$ 26 Asn ND2    | Peptide -24Glu OE1/OE2 |
| Maintained | $\alpha$ 28 Ala O      | Peptide -22Gln NE2     |
| Lost       | $\alpha$ 30 Asp OD2    | Peptide -19Lys NZ      |
| Lost       | $\alpha$ 50 Arg NH2    | MHC $\beta$ 69Glu OE1  |
| Lost       | $\alpha$ 94 Arg NH1    | MHC $\alpha$ 55Asp OD2 |
| Added      | $\alpha$ 94 Arg NH2    | Peptide -24Glu OE1/OE2 |
| Added      | $\alpha$ 94 Arg O      | Peptide -22Gln NE2     |
| Added      | $\alpha$ 99 Lys NZ     | MHC $\alpha$ 57Gln OE1 |
| Added      | $\beta$ 46 Tyr OH      | MHC $\alpha$ 57Gln OE1 |
| Added      | $\beta$ 46 Tyr OH      | MHC $\alpha$ 61Gln NE2 |
| Lost       | $\beta$ 48 Tyr OH      | MHC $\alpha$ 57Gln OE1 |
| Lost       | $\beta$ 53 Thr O       | MHC $\alpha$ 39Lys NZ  |
| Added      | $\beta$ 54 Glu OE1/OE2 | MHC $\alpha$ 39Lys NZ  |
| Added      | $\beta$ 93 Asp OD1/OD2 | Peptide -16Lys NZ      |
| Maintained | $\beta$ 95 Trp NE1     | Peptide -18Ala O       |
| Maintained | $\beta$ 95 Trp O       | MHC $\beta$ 70Arg NH2  |
| Lost       | $\beta$ 97 Asp N       | MHC $\beta$ 66Glu OE2  |

The numbers of hydrogen bonds maintained, added, and lost are 4, 7, and 6, respectively.

## (c) J809.B5

|            | TCR CDR             | peptide/MHC            |
|------------|---------------------|------------------------|
| Added      | $\alpha$ 50 Arg NH2 | MHC $\beta$ 69Glu OE1  |
| Added      | $\alpha$ 94 Lys NZ  | Peptide -24Glu OE1     |
| Lost       | $\alpha$ 95 Gly O   | Peptide -21Lys NZ      |
| Added      | $\alpha$ 97 Asp OD1 | Peptide -21Lys NZ      |
| Added      | $\alpha$ 98 Arg NH1 | MHC $\alpha$ 55Asp OD1 |
| Lost       | $\beta$ 28 Asn OD1  | Peptide -16Lys NZ      |
| Maintained | $\beta$ 29 Asn ND2  | MHC $\alpha$ 61Gln OE1 |
| Maintained | $\beta$ 48 Tyr OH   | MHC $\alpha$ 57Gln OE1 |
| Lost       | $\beta$ 53 Thr O    | MHC $\alpha$ 39Lys NZ  |
| Maintained | $\beta$ 54 Glu OE1  | MHC $\alpha$ 57Gln NE2 |
| Lost       | $\beta$ 54 Glu OE1  | MHC $\alpha$ 39Lys NZ  |
| Added      | $\beta$ 93 Asp OD1  | Peptide -16Lys NZ      |
| Lost       | $\beta$ 95 Trp N    | MHC $\alpha$ 61Gln OE1 |
| Maintained | $\beta$ 95 Trp NE1  | Peptide -18Ala O       |
| Maintained | $\beta$ 97 Asp N    | MHC $\beta$ 66Glu OE1  |
| Added      | $\beta$ 97 Asp OD2  | MHC $\beta$ 70Arg NH2  |

The numbers of hydrogen bonds maintained, added, and lost are 5, 6, and 5, respectively.

## (d) 2W20

|            | TCR CDR                 | peptide/MHC            |
|------------|-------------------------|------------------------|
| Lost       | $\alpha$ 30 Asp OD2     | Peptide 7Lys NZ        |
| Added      | $\alpha$ 93 Asp OD1/OD2 | Peptide 4Gln NE2       |
| Added      | $\alpha$ 93 Asp OD1/OD2 | Peptide 5Lys NZ        |
| Added      | $\alpha$ 97 Asn OD1     | Peptide 5Lys NZ        |
| Lost       | $\beta$ 29 Asn OD1      | MHC $\alpha$ 62Gln NE2 |
| Added      | $\beta$ 48 Tyr OH       | MHC $\alpha$ 40Lys NZ  |
| Maintained | $\beta$ 54 Glu OE1/OE2  | MHC $\alpha$ 40Lys NZ  |
| Added      | $\beta$ 95 Trp N        | MHC $\alpha$ 62Gln OE1 |
| Lost       | $\beta$ 95 Trp NE1      | Peptide 8Ala O         |
| Lost       | $\beta$ 97 Try OH       | MHC $\beta$ 96Arg NH2  |

The numbers of hydrogen bonds maintained, added, and lost are 1, 5, and 4, respectively.

(e) YAe62

|            | TCR CDR                | peptide/MHC               |
|------------|------------------------|---------------------------|
| Lost       | $\alpha$ 29 Tyr OH     | MHC $\beta$ 107His ND1    |
| Added      | $\alpha$ 50 Thr OG1    | MHC $\beta$ 92Glu OE1/OE2 |
| Lost       | $\alpha$ 51 Thr OG1    | MHC $\beta$ 95Glu OE1     |
| Added      | $\beta$ 29 Asn ND2     | MHC $\alpha$ 62Gln OE1    |
| Added      | $\beta$ 29 Asn OD1     | MHC $\alpha$ 62Gln NE2    |
| Lost       | $\beta$ 48 Tyr OH      | MHC $\alpha$ 58Gln NE2    |
| Added      | $\beta$ 52 Ser OG      | MHC $\alpha$ 40Lys NZ     |
| Maintained | $\beta$ 54 Glu OE2     | MHC $\alpha$ 40Lys NZ     |
| Added      | $\beta$ 93 Asp OD1/OD2 | Peptide 10Lys NZ          |
| Maintained | $\beta$ 95 Trp N       | MHC $\alpha$ 62Gln OE1    |

The numbers of hydrogen bonds maintained, added, and lost are 2, 5, and 3, respectively.

a) Maintained, added, and lost hydrogen bonds are defined as follows. Maintained: a hydrogen bond is formed in the crystal structure and maintained in at least 5 of the 10 MD snapshots taken every 20 ns during the MD simulation. Added: a hydrogen bond is not formed in the crystal structure but is formed in at least five MD snapshots. Lost: a hydrogen bond is formed in the crystal structure but lost in more than five MD snapshots.

**Table S7.** CH- $\pi$  interactions and the dispersion and charge-transfer interaction energies in CDR3 $\beta$ <sup>a</sup>

(a) 14.C6

| TCR            | pMHC                   | Crystal structure |                 | MD snapshot at 100 ns |       | MD snapshot at 200 ns |       |
|----------------|------------------------|-------------------|-----------------|-----------------------|-------|-----------------------|-------|
|                |                        | DI <sup>b</sup>   | CT <sup>b</sup> | DI                    | CT    | DI                    | CT    |
| $\beta$ 94 Phe | 66 Val in MHC $\alpha$ | -5.40             | -1.62           | -5.53                 | -2.02 | -                     | -     |
| $\beta$ 94 Phe | 10 Lys in peptide      | -                 | -               | -2.65                 | -0.76 | -                     | -     |
| $\beta$ 95 Trp | 62 Gln in MHC $\alpha$ | -5.33             | -2.26           | -                     | -     | -                     | -     |
| $\beta$ 95 Trp | 63 Asn in MHC $\alpha$ | -                 | -               | -2.37                 | -1.49 | -                     | -     |
| $\beta$ 95 Trp | 7 Lys in peptide       | -8.11             | -2.71           | -6.36                 | 0.00  | -5.56                 | -1.31 |
| $\beta$ 95 Trp | 94 Arg in MHC $\beta$  | -3.98             | -2.48           | -                     | -     | -3.07                 | -1.38 |

a) The CH- $\pi$  interactions were identified by Biostation-Viewer<sup>3</sup>.

b) The dispersion (DI) and charge-transfer (CT) interaction energies (kcal/mol) calculated by FMO method.

(b) J809.B5

| TCR            | pMHC                   | Crystal structure |       | MD snapshot at 100 ns |       | MD snapshot at 200 ns |       |
|----------------|------------------------|-------------------|-------|-----------------------|-------|-----------------------|-------|
|                |                        | DI                | CT    | DI                    | CT    | DI                    | CT    |
| $\beta$ 94 Phe | 66 Val in MHC $\alpha$ | -5.81             | -1.78 | -3.97                 | -0.90 | -3.32                 | -0.92 |
| $\beta$ 94 Phe | 69 His in MHC $\alpha$ | -                 | -     | -                     | -     | -2.14                 | -0.99 |
| $\beta$ 95 Trp | 62 Gln in MHC $\alpha$ | -9.56             | -3.87 | -11.93                | -7.09 | -                     | -     |
| $\beta$ 95 Trp | 66 Val in MHC $\alpha$ | -                 | -     | -                     | -     | -2.39                 | -0.67 |
| $\beta$ 95 Trp | 5 Lys in peptide       | -3.08             | -1.19 | -                     | -     | -                     | -     |
| $\beta$ 95 Trp | 7 Lys in peptide       | -7.15             | -1.87 | -                     | -     | -                     | -     |
| $\beta$ 95 Trp | 94 Arg in MHC $\beta$  | -3.31             | -1.21 | -                     | -     | -                     | -     |

(c) 2W20

| TCR            | pMHC                   | Crystal structure |       | MD snapshot at 100 ns |       | MD snapshot at 200 ns |       |
|----------------|------------------------|-------------------|-------|-----------------------|-------|-----------------------|-------|
|                |                        | DI                | CT    | DI                    | CT    | DI                    | CT    |
| $\beta$ 95 Trp | 62 Gln in MHC $\alpha$ | -6.66             | -4.16 | -8.67                 | -6.03 | -                     | -     |
| $\beta$ 95 Trp | 7 Lys in peptide       | -11.87            | -3.61 | -                     | -     | -8.10                 | -2.29 |
| $\beta$ 95 Trp | 8 Ala in peptide       | -                 | -     | -3.82                 | 0.00  | -4.24                 | -1.32 |

(d) YAc62

| TCR            | pMHC                   | Crystal structure |        | MD snapshot at 100 ns |       | MD snapshot at 200 ns |       |
|----------------|------------------------|-------------------|--------|-----------------------|-------|-----------------------|-------|
|                |                        | DI                | CT     | DI                    | CT    | DI                    | CT    |
| $\beta$ 94 Phe | 66 Val in MHC $\alpha$ | -6.50             | -1.95  | -                     | -     | -                     | -     |
| $\beta$ 95 Trp | 62 Gln in MHC $\alpha$ | -9.96             | -20.42 | -7.51                 | -2.19 | -5.07                 | -2.73 |
| $\beta$ 95 Trp | 7 Lys in peptide       | -9.01             | -3.15  | -10.85                | -3.46 | -4.90                 | -1.19 |

## References

1. Ehrenmann F, Lefranc MP. IMGT/3Dstructure-DB: querying the IMGT database for 3D structures in immunology and immunoinformatics (IG or antibodies, TR, MH, RPI, and FPIA). *Cold Spring Harb Protoc* 2011; **2011**:750–61.
2. North B, Lehmann A, Dunbrack RL, Jr. A new clustering of antibody CDR loop conformations. *J Mol Biol* 2011; **406**:228–56.
3. Nakano T, Mochizuki Y. ABINIT-MP 5.0 and BioStation Viewer 13.01 (MIZUHO Rev.). *Research and Development of Innovative Simulation Software* 2011.
